# 1 **Molecular and genetic approaches for assaying human cell type synaptic** 2 **connectivity**

3  
4 Mean-Hwan Kim<sup>1\*</sup>, Cristina Radaelli<sup>1#</sup>, Elliot R. Thomsen<sup>1#</sup>, Joseph T. Mahoney<sup>1</sup>, Brian Long<sup>1</sup>, Michael J.  
5 Taormina<sup>1</sup>, Sara Kebede<sup>1</sup>, Clare Gamlin<sup>1</sup>, Staci A. Sorensen<sup>1</sup>, Luke Campagnola<sup>1</sup>, Nick Dee<sup>1</sup>, Florence D'Orazi<sup>1</sup>,  
6 Andrew L. Ko<sup>2</sup>, Jeffrey G. Ojemann<sup>2</sup>, Daniel L. Silbergeld<sup>2</sup>, Ryder P. Gwinn<sup>3</sup>, Charles Cobbs<sup>3</sup>, C. Dirk Keene<sup>4</sup>,  
7 Tim Jarsky<sup>1</sup>, Gabe Murphy<sup>1,5</sup>, Hongkui Zeng<sup>1</sup>, Philip R. Nicovich<sup>1</sup>, Jonathan T. Ting<sup>1,5</sup>, Boaz P. Levi<sup>1\*</sup>, Ed S.  
8 Lein<sup>1,2</sup>

9  
10 1 Allen Institute for Brain Science, Seattle, WA, USA

11 2 Department of Neurological Surgery, School of Medicine, University of Washington, Seattle, WA, USA

12 3 Swedish Neuroscience Institute, Seattle, WA, USA

13 4 Department of Pathology, University of Washington, Seattle, WA, USA

14 5 Department of Physiology & Biophysics, University of Washington, Seattle, WA, USA

15  
16 # Equal contribution.

17 \*Correspondence should be addressed to M.H.K (meanhwank@alleninstitute.org) or B.P.L  
18 (boazl@alleninstitute.org).

## 19 20 21 **ABSTRACT**

22  
23  
24 **Prospective and *post-hoc* molecular identification of specific neuron types is essential for functional studies**  
25 **of cellular and synaptic properties. We demonstrate a thick brain slice mFISH technique applied to multi-**  
26 **patch-clamp recordings in human cortical slices obtained from neurosurgical-excised tissue to reveal the**  
27 **molecular and morpho-electric properties of synaptically connected neurons, both with and without**  
28 **prospective AAV based genetic labeling. This “quadruple modality” methodology should be extensible to**  
29 **other local brain circuits in many organisms.**

## 30 INTRODUCTION

31  
32 Intrinsic membrane properties and synaptic connectivity have been extensively studied in rodent brain  
33 slice preparations aided by various genetic tools (Pfeffer et al., 2013; He et al., 2016; Tremblay et al., 2016).  
34 Unfortunately, far less is known about cellular and circuit properties of the human brain. Work from several  
35 research groups has shown that electrophysiological properties and local connectivity can be studied in acute  
36 human neocortical slices derived from surgical resections (Molnar et al., 2008; Jiang et al., 2012; Testa-Silva et  
37 al., 2014; Kalmbach et al., 2018; Beaulieu-Laroche et al., 2018; Seeman et al., 2018; Peng et al., 2019). These  
38 excised tissues are often distal to epileptic seizure foci or deep brain tumors and in many cases are devoid of overt  
39 pathology (Szabadics et al., 2006; Verhoog et al., 2013; Tian et al., 2014; Wang et al., 2015; Beaulieu-Laroche et  
40 al., 2018; Berg et al 2020). Human *ex vivo* neocortical slices can also be cultured for weeks to months (Eugene  
41 et al, 2014; Schwarz et al., 2017), and viral transgenesis allows genetic manipulation of cells in brain slices  
42 (Andersson et al, 2016; Le Duigou et al, 2018; Ting et al., 2018; Mich et al., 2020; Schwarz et al, 2019).

43  
44 Here, we present new innovations to study cellular and synaptic physiology at the level of molecularly  
45 defined cell subclasses in human *ex vivo* brain slices. We applied conventional patch-clamp electrophysiology  
46 with multiple cells simultaneously (multi-patch-clamp, refer to MPC) to investigate local synaptic connectivity,  
47 cellular morphology and intrinsic membrane properties, coupled with *post-hoc* multiplexed *in situ* hybridization  
48 (mFISH) to reveal molecular properties of characterized neurons and synapses. We also demonstrate the  
49 application of cell class-specific adeno-associated virus (AAV) vectors to prospectively mark human cell classes  
50 for functional characterization of the neocortical circuitry, where RNA expression, synaptic connectivity, intrinsic  
51 physiology, and cell morphology can all be assessed. This quadruple modality approach connects RNA-based  
52 molecular profiling of individual neurons with cell morphology and their functional circuit properties including  
53 synaptic connectivity and plasticity, demonstrated here in the human cortex but likely broadly applicable to  
54 traditionally non-genetically manipulatable organisms.

## 55 RESULTS

56  
57  
58 The goal of the study was to combine cell subclass-specific marker gene detection with simultaneous MPC  
59 recordings to measure local synaptic connectivity, morphology, and intrinsic membrane properties of connected  
60 neurons in the human neocortex. Two main experimental applications were performed. One is an acute brain slice  
61 preparation and the other is an organotypic brain slice culture preparation. Both acute and cultured brain slice  
62 experiments can be performed from a single surgical case given that multiple slices are generated from a single  
63 resection whose average volume is  $1.39 \pm 0.57 \text{ cm}^3$  (mean  $\pm$  standard error of mean; averaged over  $n = 12$  cases).  
64 Notably, the time window to perform acute ( $<12$  hours following surgical resection) and slice culture experiments  
65 (2.5-7 days *in vitro*, DIV; **Fig. 1** and **Extended Data Fig. 1**) are different. In slice culture experiments, viral  
66 vector and regulatory region confer a cell class or subclass-specific fluorescent label to the tissue and facilitates  
67 targeting the marked neurons for MPC recordings. In acute slice preparations, neurons were targeted based on  
68 somatic shape as visualized by oblique illumination. After MPC electrophysiology experiments concluded,  
69 mFISH was conducted on fixed brain slices, and morphological analyses were performed based on backfilled  
70 biocytin/streptavidin staining (**Fig. 1**). Thus, these experiments provide deep characterization of neocortical  
71 microcircuitry by simultaneous measurement of intrinsic membrane properties, synaptic connectivity, marker  
72 gene detection, and cell morphology.

### 73 74 **Local synaptic connectivity and their intrinsic membrane properties in acute human cortical slices**

75  
76 With the 350  $\mu\text{m}$  thick acute brain slice preparation, connectivity assays with MPC recordings were  
77 performed by targeting cell bodies located between 50 and 120  $\mu\text{m}$  below the surface of the slice to avoid

78 truncation of dendrites and other superficial damage that occurs during slice preparation (**Fig. 2a-g**; Seeman et  
79 al., 2018). For molecular characterization, we opted to apply mFISH in patched slices since measurement of  
80 mRNA allows direct correlation with single-cell/single-nucleus RNA-seq data which has been used to classify  
81 cortical neurons (Lake et al., 2016; Hodge et al., 2019), and is more easily adapted to new gene targets.  
82 Hybridization chain reaction (HCR) was chosen since it penetrates tissue efficiently (Choi et al., 2010), allows  
83 strong signal amplification, has high signal-to-noise with background-reducing probe design (Choi et al., 2018),  
84 and permits multiple rounds of stripping and re-probing (Nicovich et al., 2019; **Fig.3, Extended Data Fig. 2**.  
85 Following MPC recordings (**Fig. 2b-g**), slices were fixed, passively cleared, and stained by mFISH using HCR  
86 kit version 3.0 (Shah et al., 2016; Choi et al., 2018). Messenger RNA from excitatory (*SLC17A7*) and inhibitory  
87 (*GADI*) marker genes were easily resolved in both patched (biocytin/streptavidin, StAv) and neighboring non-  
88 patched neurons (**Extended Data Fig. 3a-d**). As expected, *SLC17A7* and *GADI* expression was mutually  
89 exclusive in excitatory and inhibitory neurons, respectively, and only *GADI*<sup>+</sup> cells were found in layer 1.  
90 Importantly, *SLC17A7* mRNA staining was comparable between patched and neighboring non-patched neurons  
91 after a long whole-cell recording indicating that dialysis of mRNA from the cell during recording was not  
92 detectable in excitatory neurons (around 30-75 min; **Extended Data Fig. 3b,c,i,j**). We were also able to resolve  
93 *SLC17A7* and *GADI* mRNA staining through the depth of the slice and didn't observe any significant changes of  
94 averaged fluorescent intensities in individual neurons (**Extended Data Fig. 3j,k**).  
95

96 Studying connectivity between defined interneuron subclasses in acute human slice preparations is  
97 challenging because 1) GABAergic interneurons are difficult to identify during acute MPC experiments since  
98 they are not abundant (~20-30% of cortical neurons; **Fig. 2j-l**), and 2) unambiguous identification of interneuron  
99 subclass identity (e.g. PVALB, SST, VIP, LAMP5) has not been reliable with *post-hoc* immunohistochemistry in  
100 both non-human primate and human tissues. For example, PVALB antibodies works well (Szegedi et al., 2017),  
101 but SST and VIP antibodies do not work reliably in our hands (data not shown). Here, the GABAergic interneuron  
102 subclasses PVALB, SST, and VIP were readily resolved using HCR and RNA transcript probes for PVALB, SST,  
103 VIP and LAMP5 (lower panel of **Extended Data Fig. 2**). Inhibitory neurons were occasionally recorded during  
104 the acute MPC experiments. For example, a fast spiking interneuron (Reyes et al., 1998; cell4 in **Fig. 2b**) revealed  
105 strong excitatory postsynaptic potential (EPSP) responses that rapidly depress (e.g., cell1 to cell4 and cell2 to  
106 cell4), compared to small responses with weakly depressing characteristics in pyramidal neurons from presynaptic  
107 pyramidal neuron (e.g., cell3 to cell5; **Fig. 2b,c**). The intrinsic features (**Fig. 2d-g**) and morphology (**Fig. 2h,i**) of  
108 this cell were consistent with the identity of a PVALB cell type, although *PVALB* mRNA staining was very weak.  
109 This was seen with several patched *PVALB*<sup>+</sup> cells, where *PVALB* mRNA abundance was at lower levels than  
110 adjacent unpatched *PVALB*<sup>+</sup> cells (**Extended Data Fig. 3e-g**). Whether this reflects real differences in mRNA  
111 abundance between cells, or dilution or leakage of this subclass mRNA through patch pipette during whole-cell  
112 recording is unclear. Human tissue often exhibits dense lipofuscin around some somatic structures (**Fig. 2j-l**,  
113 **Extended Data Fig. 3e-g**), and persists after tissue clearing with 8% SDS and throughout the mFISH staining  
114 procedure. However, it was possible to distinguish the distribution of amplified mRNA fluorescent dots from  
115 lipofuscin autofluorescence by imaging across multiple channels, as lipofuscin is fluorescent in all channels (e.g.  
116 **Extended Data Fig. 3e-g**).  
117

### 118 MPC electrophysiology in virally transduced human *ex vivo* cultured cortical slices

119  
120 To overcome the difficulty in targeting diverse interneuron subclasses, we performed rapid viral genetic  
121 labeling of cortical GABAergic interneurons. We applied an adeno-associated virus (AAV) vector that drives  
122 SYFP2 reporter express under the control of an optimized forebrain GABAergic neuron enhancer (Stuhmer et al.,  
123 2002; Dimidschstein et al., 2016) in human organotypic slice culture (see **Methods**; Ting et al., 2018; Mich et al.,  
124 2020). Inhibitory subclass identity was established *post-hoc* by mFISH staining. Virus was directly applied to the  
125 slice surface at a concentration of 1-5e<sup>10</sup> vg/slice. Fast reporter expression allowed us to execute physiology

126 experiments between 2.5 and 7 days after viral administration. We performed targeted MPC recording with AAV-  
127 DLX2.0-SYFP2 labeled cortical slices at 7 DIV (**Fig. 3a**; see also the example traces of connectivity assay  
128 performed in 2.5 DIV with viral labeling, **Extended Data Fig. 1**). SYFP2<sup>+</sup> neurons were targeted to evaluate the  
129 connectivity between interneurons. Inhibitory postsynaptic potential (IPSP) responses were detected in multiple  
130 connected cell pairs (cell6 to cell8 and cell9 to cell8; **Extended Data Fig. 4a**). Spike trains with 8 pulses at 20  
131 Hz in the presynaptic cell induced synaptic depression of IPSP responses (**Fig. 3g,h**). Recovery from synaptic  
132 depression was measured by probing with additional 4 pulses after variable inter-spike intervals (250 ms, 500 ms,  
133 1 s, 2 s and 4 s) following induction by the 8 pulses spike train at 50 Hz (**Fig. 3g,h**). Occasionally, electrical  
134 synapses mediated by gap junctions were detected between interneurons (**Fig. 3c**). Intrinsic membrane properties  
135 of patched interneurons were investigated with step depolarization (**Fig. 3d-f**, **Extended Data Fig. 4b**) and they  
136 appear indistinguishable from human cortical interneuron properties measured in acute slices (**Fig. 3d-f vs Fig.**  
137 **2d-g**).

138  
139 Cell subclass identity was subsequently established using multi-round mFISH staining and mRNA signals  
140 were quantified (**Fig. 3i-m**, **Extended Data Figs. 5&6**). We didn't observe any noticeable difference of mRNA  
141 staining signals between patched and neighboring non-patched neurons in slice culture (**Extended Data Fig. 6a**).  
142 The ability to stain across multiple rounds allowed probing for an increased number of genes, and re-probing for  
143 genes that produced low signal from the first round such as VIP (**Fig. 3k-m** cell3). Axonal and dendritic  
144 morphologies were then reconstructed based on biocytin fills and streptavidin staining (**Fig. 3j**) as was done in  
145 acute slices (**Fig. 2h,i**), to allow comparison of morphologies across preparations. All ten patched cells were  
146 GABAergic, and multiple VIP, SST, and PVALB-positive cells were patched from two sets of MPC recording  
147 attempts (box **i,ii** of **Fig. 3i**). This experiment shows how application of a cell class specific AAV vector facilitates  
148 highly efficient prospective cell class labeling and subsequent identification of cortical interneuron subclasses  
149 that are difficult to reliably target in acute brain slice preparations.

150  
151 We noted some differences between MPC recordings in viral labeled slice culture and acute slice  
152 preparation. First, giga-ohm seals were more readily obtained between patch pipette and cell membrane in neurons  
153 from *ex vivo* cultured slices compared to acute slices. Second, although patching reporter-labeled cells was easier,  
154 the somatic structure of unlabeled neurons was more difficult to resolve in slice culture with minimal positive  
155 pressure on the patch pipette, making patching unlabeled neurons more challenging. Nonetheless, the ability to  
156 exclusively target genetically labeled GABAergic neuron subclasses in the human neocortex greatly improved  
157 throughput and efficiency of targeted recording experiments. In summary, we demonstrate techniques that allow  
158 efficient analysis of synaptic connectivity and intrinsic membrane properties in specific neuron subclasses in  
159 human brain tissues, both in acute slices (**Fig. 2**) and slice cultures using viral reporters for prospective labeling  
160 (**Fig. 3**).

## 161 **DISCUSSION**

162  
163  
164 Major advances in understanding the cellular makeup of complex brain tissues are being driven by single  
165 cell transcriptomic technologies combined with large-scale brain atlasing efforts to create molecularly defined  
166 cell taxonomies in mouse, monkey and human. In mice, molecular characterization of cell types (Zeisel et al.,  
167 2015; Tasic et al., 2018; Ximerakis et al., 2019) has led to increasingly refined tools for genetic access and highly  
168 granular characterization of neuronal circuit elements (He et al., 2016; Daigle et al., 2018). In contrast,  
169 understanding fine-grained microcircuitry in human tissue as well as in non-genetically tractable organisms has  
170 lagged far behind. A major challenge therefore is to develop techniques that allow a similar analysis of  
171 molecularly defined circuit elements for biomedical research. Significant advances in *in vitro* slice physiology  
172 and slice culture on human neurosurgical specimens, as well as in the development of AAV vectors for rapid  
173 infection and cell type-specific transgene expression, provide new avenues for targeted analysis of specific cell

174 types in the brain. These methods provide a means to study neuronal and circuit properties in human neocortex  
175 and link them to emerging molecular classifications of cell types with a combination of prospective labeling and  
176 *post-hoc* identification with marker gene panels.

177  
178 As demonstrated here, mFISH with multiple rounds of staining can be executed on cleared thick *in vitro*  
179 human slice preparations, preserving tissue integrity and cell morphology, thereby allowing molecular  
180 identification of synaptically connected neurons using robust marker genes for neuron subclasses. We showed  
181 that this methodological approach of quadruple modality functional characterization can be extended to slice  
182 culture with viral labeling as well. This approach is well poised to take advantage of an increasing number of  
183 enhancer-driven subclass and type-specific viral tools (Dimidschstein et al., 2016; Hrvatin et al., 2019; Jüttner et  
184 al., 2019; Mehta et al., 2019; Nair et al., 2019; Mich et al., 2020; Graybuck et al., 2020; Vormstein-Schneider et  
185 al., 2020) to allow prospective targeting of cell classes or subclasses, and subsequent refinement of cell type  
186 identity by a combination of marker genes using mFISH. Brain slice culturing and viral transgenesis will allow  
187 not only measurement, but also functional manipulation of the human microcircuit, e.g. *via* optogenetic  
188 approaches. Together, these methods provide unprecedented ability to probe the fine circuit architecture of the  
189 human neocortex and can accelerate progress towards uncovering conserved and specialized features of human  
190 brain circuit organization and function.

191  
192 A number of challenges were identified for future improvement. Although mRNA labeling was robust for  
193 abundant genes, less abundant genes were more difficult to detect. Autofluorescence from lipofuscin, a common  
194 feature of human brain tissue, can complicate analysis and obscure mRNA signal. Improvement of lipofuscin  
195 mitigation techniques will facilitate future analysis. In some cases, we did not readily detect expected mRNA  
196 transcripts for cells with certain types of electrophysiological features (such as fast-spiking inhibitory neurons  
197 that would be expected to express PVALB). This could be the true state of the cell, or due to loss of mRNA  
198 through the patch pipette or leakage from the cell after pipette withdrawal. Finally, greater cell type resolution  
199 will be gained through the use of more highly multiplexed mFISH techniques (Chen et al., 2015; Eng et al., 2019).  
200 Despite these opportunities for further refinement, the approach outlined here enables unprecedented quadruple  
201 modality functional interrogation of human brain cell types and is a valuable step toward deciphering the  
202 correspondence between these multiple data modalities.

### 203 **Online content**

204 Any methods, additional references, Nature Research reporting summaries, source data, extended data,  
205 supplementary information, acknowledgements, peer review information; details of author contributions and  
206 competing interests; and statements of data and code availability are available at <http://>

### 207 **Data availability**

208  
209 The electrophysiology and imaging data sets that support the findings of this study are available from the  
210 corresponding authors upon reasonable request.

### 211 **Code availability**

212  
213 The software codes used for the analyses are available from the corresponding authors upon reasonable request.  
214



## 215 References

- 216 Andersson, M. et al. Optogenetic control of human neurons in organotypic brain cultures. *Sci Rep* **6**, 24818  
217 doi:10.1038/srep24818 (2016).
- 218 Beaulieu-Laroche, L. et al. Enhanced dendritic compartmentalization in human cortical neurons. *Cell* **175**, 643-  
219 651 (2018).
- 220 Berg, J. et al. Human cortical expansion involves diversification and specialization of supragranular  
221 intratelencephalic-projecting neurons. *bioRxiv* preprint doi: 10.1101/2020.03.31.018820 (2020).
- 222 Chen, K.H. et al. RNA imaging. Spatially resolved, highly multiplexed RNA profiling in single cells. *Science*  
223 **348**, aaa6090 (2015).
- 224 Choi, H.M.T. et al. Programmable in situ amplification for multiplexed imaging of mRNA expression. *Nat.*  
225 *Biotechnol.* **28**, 1208-1212 (2010).
- 226 Choi, H.M.T. et al. Third-generation in situ hybridization chain reaction: multiplexed, quantitative, sensitive,  
227 versatile, robust. *Development* **145**, doi: 10.1242/dev.165753 (2018).
- 228 Daigle, T.L. et al. A suite of transgenic driver and reporter mouse lines with enhanced brain-cell-type targeting  
229 and functionality. *Cell* **174**, 465-480.e22 (2018).
- 230 Dimidschstein, J. et al. A viral strategy for targeting and manipulating interneurons across vertebrate species. *Nat*  
231 *Neurosci* **19**, 1743-1749 (2016).
- 232 Eng, C.H.L. et al. Transcriptomic-scale super-resolved imaging in tissues by RNA seqFISH. *Nature* **568**, 235-  
233 239 (2019).
- 234 Eugene, E. et al. An organotypic brain slice preparation from adult patients with temporal lobe epilepsy. *J.*  
235 *Neurosci. Methods* **235**, 234-244 (2014).
- 236 Graybuck, L.T. et al. Enhancer viruses and transgenic platform for combinatorial cell subclass-specific labeling.  
237 *bioRxiv* preprint doi: 10.1101/ 525014 (2020).
- 238 He, M. et al. Strategies and tools for combinatorial targeting of GABAergic neurons in mouse cerebral cortex.  
239 *Neuron* **91**, 1228-1243 (2016).
- 240 Hrvatin, S. et al. A scalable platform for the development of cell-type-specific viral drivers. *Elife* **8**, pii: e48089,  
241 doi:10.7554/eLife.48089 (2019).
- 242 Hodge, R.D. et al. Conserved cell types with divergent features in human versus mouse cortex. *Nature* **573**, 61-  
243 68 (2019).
- 244 Jiang, M. et al. Enhancement of asynchronous release from fast-spiking interneuron in human and rat epileptic  
245 neocortex. *PLoS Biol.* **10**, e1001324. doi: 10.1371/journal.pbio.1001324. (2012).
- 246 Jüttner, J. et al. Targeting neuronal and glial cell types with synthetic promoter AAVs in mice, non-human  
247 primates and humans. *Nat Neurosci.* **22**, 1345-1356 (2019).
- 248 Kalmbach, B.E. et al. h-channels contribute to divergent intrinsic membrane properties of supragranular  
249 pyramidal neurons in human versus mouse cerebral cortex. *Neuron* **100**, 1194-1208 (2018).
- 250 Lake, B.B. et al. Neuronal subtypes and diversity revealed by single-nucleus RNA sequencing of the human brain.  
251 *Science* **352**, 1586-1590 (2016).
- 252 Le Duigou, C. et al. Imaging pathological activities of human brain tissue in organotypic culture. *J. Neurosci.*  
253 *Methods* **298**, 33-44 (2018).
- 254 Mehta, P. et al. Functional access to neuron subclasses in rodent and primate forebrain. *Cell Rep* **26**, 2818-2832  
255 (2019).
- 256 Mich, J.K. et al. Functional enhancer elements drive subclass-selective expression from mouse to primate  
257 neocortex. *bioRxiv* preprint doi: 10.1101/555318 (2020).
- 258 Molnar, G. et al. Complex events initiated by individual spikes in the human cerebral cortex. *PLoS Biol.* **6**, e222  
259 doi: 10.1371/journal.pbio.0060222 (2008).

- 260 Nair, R.R. et al. Generation of viral vectors specific to neuronal subtypes of targeted brain regions by Enhancer-  
261 Driven Gene Expression (EDGE). *bioRxiv* preprint doi: 10.1101/606467 (2019).
- 262 Nicovich, P.R. et al. Multimodal cell type correspondence by intersectional mFISH in intact tissues. *bioRxiv*  
263 preprint doi: 10.1101/525451 (2019).
- 264 Peng, Y. et al. High-throughput microcircuit analysis of individual human brains through next-generation  
265 multineuron patch-clamp. *Elife* **8** pii: e48178, doi: 10.7554/eLife.48178 (2019).
- 266 Pfeffer, C.K. et al. Inhibition of inhibition in visual cortex: the logic of connections between molecularly distinct  
267 interneurons. *Nat Neurosci.* **16**, 1068-1076 (2013).
- 268 Reyes, A. et al. Target-cell-specific facilitation and depression in neocortical circuits. *Nat Neurosci.* **1**, 279-285  
269 (1998).
- 270 Schwarz, N. et al. Human cerebrospinal fluid promotes long-term neuronal viability and network function in  
271 human neocortical organotypic brain slice cultures. *Sci Rep* **7**, 12249, doi:10.1038/s41598-017-12527-9 (2017).
- 272 Schwarz, N. et al. Long-term adult human brain slice cultures as a model system to study human CNS circuitry  
273 and disease. *Elife* **8** pii: e48417, doi: 10.7554/eLife.48417 (2019).
- 274 Seeman, S.C. et al. Sparse recurrent excitatory connectivity in the microcircuit of the adult mouse and human  
275 cortex. *Elife* **7** pii: e37349, doi: 10.7554/eLife.37349 (2018).
- 276 Shah, S. et al. Single-molecule RNA detection at depth by hybridization chain reaction and tissue hydrogel  
277 embedding and clearing. *Development* **143**, 2862-2867 (2016).
- 278 Stuhmer, T. et al. Expression from a Dlx gene enhancer marks adult mouse cortical GABAergic neurons. *Cereb.*  
279 *Cortex* **12**, 75-85 (2002).
- 280 Szabadics, J. et al. Excitatory effect of GABAergic axo-axonic cells in cortical microcircuits. *Science* **311**, 233-  
281 235 (2006).
- 282 Szegedi, V. et al. High-precision fast-spiking basket cell discharges during complex events in the human  
283 neocortex. *eNeuro* **4** ENEURO.0260-17.2017. doi: 10.1523/ENEURO.0260-17 (2017).
- 284 Tasic, B. et al. Shared and distinct transcriptomic cell types across neocortical areas. *Nature* **563**, 72-78 (2018).
- 285 Testa-Silva, G. et al. High bandwidth synaptic communication and frequency tracking in human neocortex. *PLoS*  
286 *Biol.* **12**, e1002007 doi: 10.1371/journal.pbio.1002007 (2014).
- 287 Tian, C. et al. Molecular identity of axonal sodium channels in human cortical pyramidal cells. *Front Cell*  
288 *Neurosci* **8**, 297 doi: 10.3389/fncel.2014.00297 (2014).
- 289 Ting, J.T. et al. A robust ex vivo experimental platform for molecular-genetic dissection of adult human  
290 neocortical cell types and circuits. *Sci Rep* **8**, 8407, doi:10.1038/s41598-018-26803-9 (2018).
- 291 Tremblay, R. et al. GABAergic interneurons in the neocortex: from cellular properties to circuits. *Neuron* **91**,  
292 260-292 (2016).
- 293 Verhoog, M.B. et al. Mechanisms underlying the rules for associative plasticity at adult human neocortical  
294 synapses. *J. Neurosci.* **33**, 17197-17208 (2013).
- 295 Vormstein-Schneider, D. et al. Viral manipulation of functionally distinct interneurons in mice, non-human  
296 primates and humans. *Nat Neurosci.* doi: 10.1038/s41593-020-0692-9 (2020).
- 297 Ximerakis, M. et al. Single-cell transcriptomic profiling of the aging mouse brain. *Nat Neurosci.* **22**, 1696-1708  
298 (2019).
- 299 Wang, B. et al. A subtype of inhibitory interneuron with intrinsic persistent activity in human and monkey  
300 neocortex. *Cell Rep* **10**, 1450-1458 (2015).
- 301 Zeisel, A. et al. Brain structure. Cell types in the mouse cortex and hippocampus revealed by single-cell RNA-  
302 seq. *Science* **347**, 1138-1142 (2015).

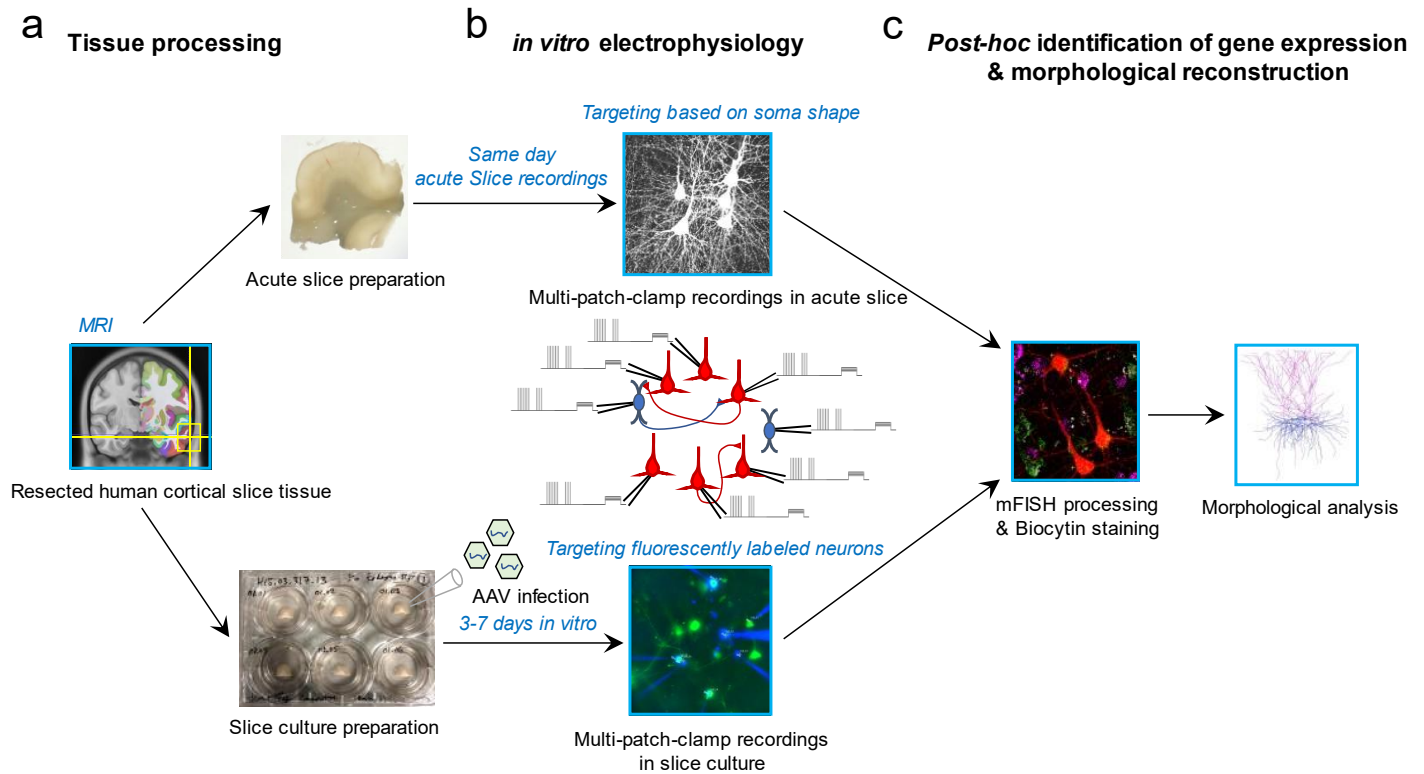

303  
304

305 **Fig. 1 | Schematic of experimental workflow.** **a**, Human neocortical tissue from neurosurgical resection enters  
306 either acute slice preparation within 45 min following scalpel excision from the patient (upper) or organotypic  
307 slice culture preparation with viral transduction (lower). **b**, Up to eight simultaneous patch-clamp recordings are  
308 performed on either acute slices (upper) or slice culture after 2.5 to 7 days *in vitro* (lower). Targeting of neurons  
309 is either carried out by visually identifying cell bodies using an upright microscope with oblique illumination  
310 (upper) or by targeting neurons expressing fluorescent reporter following viral infection (lower). **c**, Multiplexed  
311 fluorescence *in situ* hybridization (mFISH) and biocytin/streptavidin staining for morphological reconstruction is  
312 performed on fixed slices.



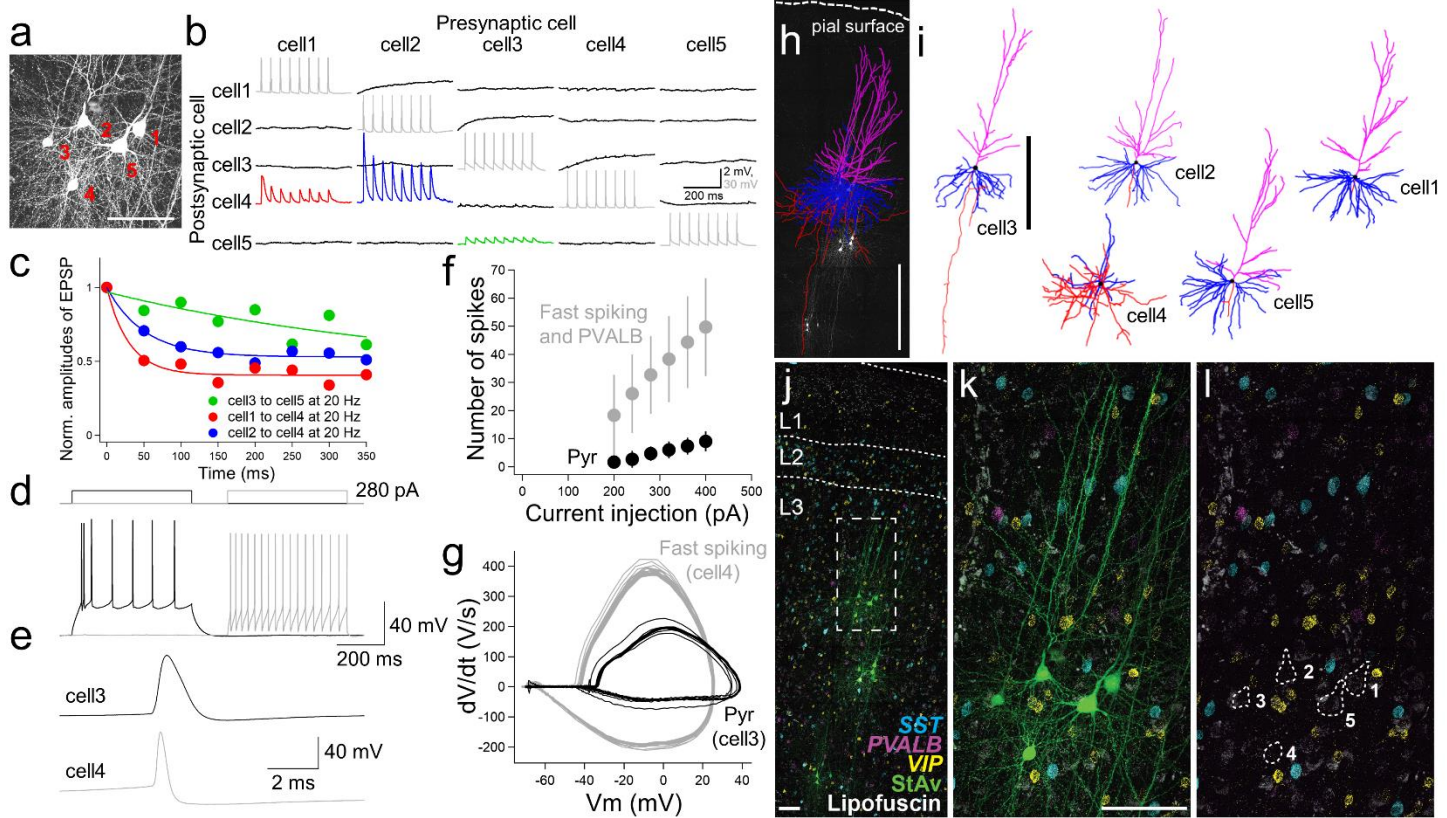

**Fig. 2 | Quadruple modality data in acute *ex vivo* human neocortex.** An example of an experiment using the acute slice preparation with five cells simultaneously patched. **a**, Maximum intensity projection montage confocal image of biocytin/streptavidin labeling. Scale bar, 50  $\mu\text{m}$ . **b**, Corresponding membrane voltage traces of connectivity assay. Presynaptic action potentials (gray) in individual neurons (cell1 to cell5) were sequentially generated by 8 brief current pulses at 20 Hz while simultaneously recording the postsynaptic membrane voltage in non-stimulated neurons in current-clamp mode (black). Traces were averaged with 10 repetitive 8 pulse stimulation. This probing uncovers a strong and adapting excitatory synaptic connection from cell 2 to cell 4 (blue trace) and cell1 to cell4 (red trace) compared to the synaptic connection from cell3 to cell5 (green). **c**, Summary plot of short-term synaptic dynamics with presynaptic 20 Hz stimulation (8 pulses at 20 Hz) in connected pairs shown in **b**. Amplitude is normalized to the size of the initial EPSP. **d**, Example traces of action potential generation by step current injection in regular spiking (cell3, black) and fast spiking neuron (cell4, gray). The same amount of current injection (280 pA) was applied to cell3 and cell4. **e**, Spike shape comparison between regular and fast spiking neurons detected in the connectivity assay shown in **b**. **f**, a frequency-current curve of pyramidal neuron (Pyr; mean  $\pm$  standard deviation,  $n = 3$ ), and fast spiking neuron (panel **k**, cell4) and PVALB positive neurons (upper 2 cells marked as dotted lines, panel **g** of **Extended Data Fig. 3**) (Fast spiking and PVALB; mean  $\pm$  standard deviation,  $n = 3$ ). **g**, Phase plot ( $dV/dt$  vs  $V$ ) analysis based on the responses shown in **d**. **h**, Morphological reconstruction of the 5 recorded neurons shown in **a**. Scale bar, 500  $\mu\text{m}$ . **i**, Reconstruction of individual neurons. Scale bar, 500  $\mu\text{m}$ . Blue, magenta, and red indicate basal dendrites, apical dendrites, and axons in pyramidal neurons (cell 1,2,3,5). For the interneuron (cell4), blue and red indicate dendritic and axonal structures, respectively. **j**, Fluorescence montage of cells imaged in **a**, **j-l** stained by mFISH for inhibitory neuron subclass markers (*PVALB*, *SST*, and *VIP*) and biocytin. MPC recordings were performed on three separate cell clusters in this slice (**j**). Note, substantial lipofuscin is observed in this slice. White box in **j** is shown at higher magnification for mFISH and biocytin (**k**), or mFISH only (**l**).

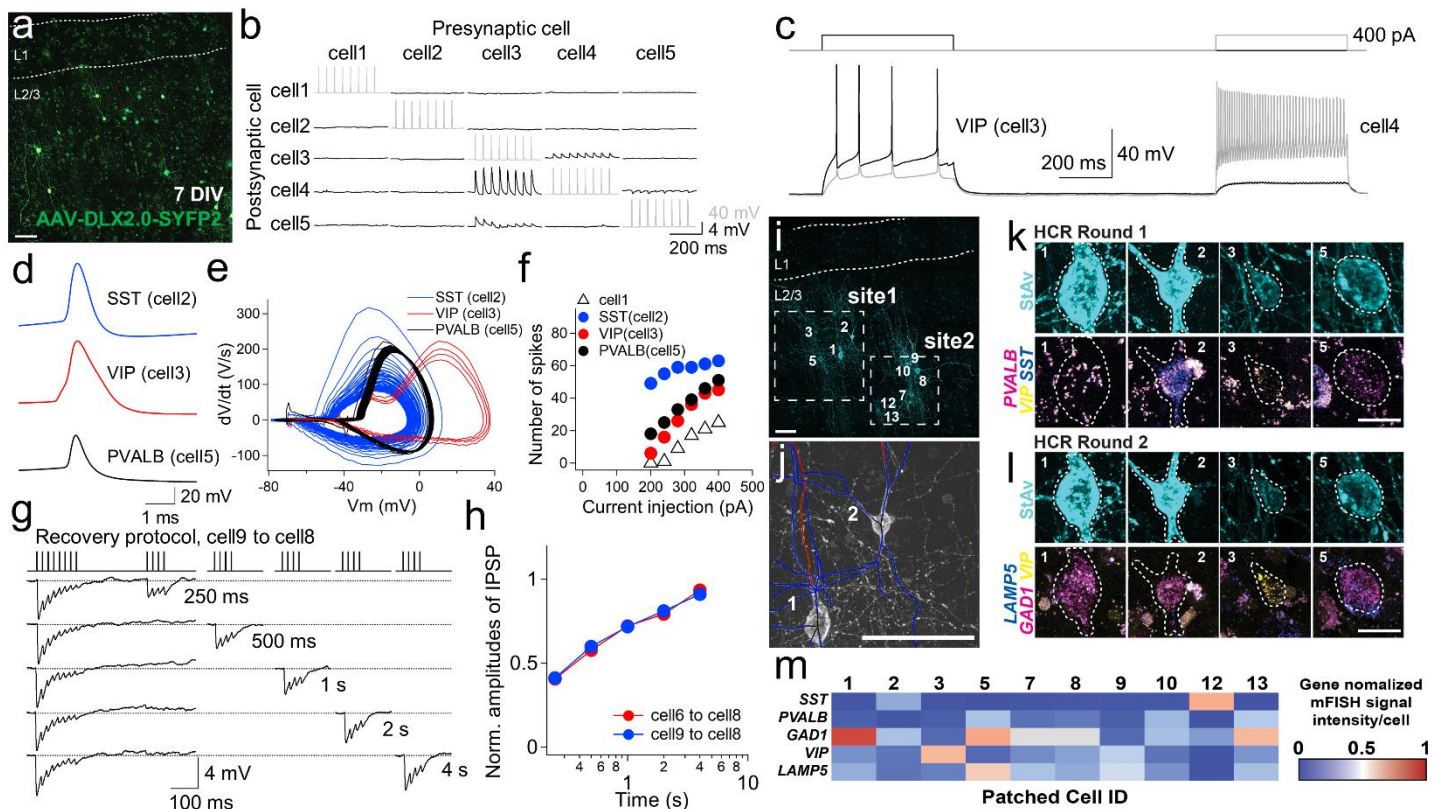

**Fig. 3 | Quadruple modality data from AAV-labeled cortical GABAergic interneurons.** **a**, Fluorescence montage of SYFP2 expression from a GABAergic neuron enhancer AAV (AAV-DLX2.0-SYFP2) in *ex vivo* human neocortex after seven days in culture (7 DIV refer to 7 days *in vitro*). **b**, Traces of local synaptic connectivity of patched neurons (shown in **site1** of panel **i**; note that cell numbers in **i** are corresponding to the cell numbers in panels **b-h**, and **j-m**). Traces were averaged over 5 repetition of the 8 pulses stimulation at 20 Hz. **c**, Example of gap junctional connectivity between interneurons. Note that current injection from one cell propagated to another cell and synchronized timing of action potentials. Cell3 (left; black trace) was identified as *VIP*<sup>+</sup> by HCR staining but we failed to detect the subclass level identity of cell4 (right; gray trace) see panel **i**, **m**. **d**, Spike shape examples detected in different subclass interneurons, i.e., SST (cell2), VIP (cell3), and PVALB (cell5) by HCR staining shown in panels **k-m**. **e**, Phase plot ( $dV/dt$  vs  $V$ ) analysis based on the step current injection of 400 pA in 3 subclass cell types detected in this experiment (panel **e**). **f**, Frequency-current curves from the trial shown in **site1** of panel **i**. **g**, For the connectivity assay, an additional 4 presynaptic pulses were applied a variable interval (250 ms, 500 ms, 1 s, 2 s, and 4 s) after the 8 pulses stimulation protocol to assay recovery from depression. Connected pairs from cell9 to cell8, averaged 5 times). **h**, Time course of recovery from depression. Two examples are displayed with connected pairs (cell6 to cell8, cell9 to cell8). **i**, Fluorescent montage images of two neuron clusters evaluated by MPC recordings highlighted with boxes **site1** and **site2** with patched cell numbers. Patched neurons displayed with biocytin/streptavidin staining (**i**) compared to SYFP2 fluorescence shown in panel **a**. Scale bar, 100  $\mu$ m. **j**, Morphological reconstruction example. Blue indicates dendritic and red indicates axonal tracing. Scale bar, 50  $\mu$ m. **k-l**, Some examples of HCR staining detection. High resolution images of individual patched cells stained by mFISH in round 1 (**k**) against for *PVALB*, *SST*, and *VIP*, and round 2 (**l**) for *LAMP5*, *GAD1*, and *VIP*. Scale bar, 10  $\mu$ m. **m**, Expression level of each gene for each patched cell was quantified based on average intensity per cell. The average intensity was normalized by maximum value detected among the manually segmented patched and non-patched cells shown in **Extended Data Fig. 6a**.



362 Normalized values are displayed with heat map (see also non-normalized values and heat map in **Extended Data**  
363 **Fig. 6b**). Note that some cells were successfully recorded with MPC electrophysiology but were not recovered  
364 after staining.

365  
366

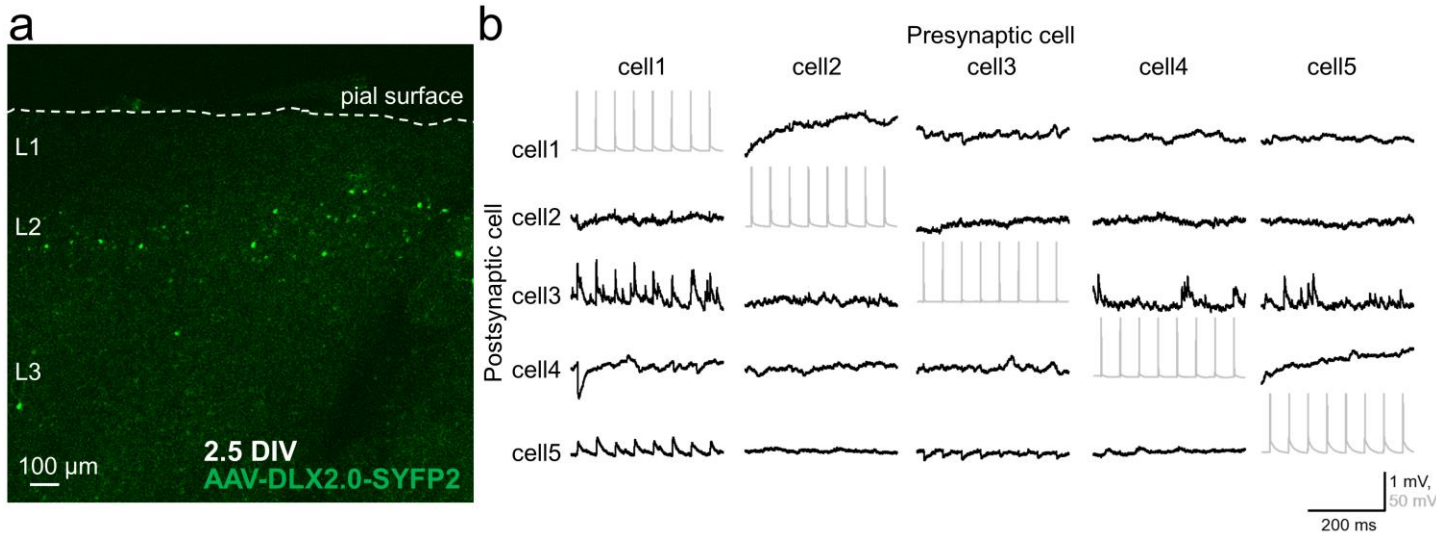

367

368 **Extended Data Fig. 1 | Example of rapid expression of AAV-DLX2.0-SYFP2 virus labeling and**  
369 **corresponding MPC recording.** Representative experiment was performed on 2.5 days *in vitro* (DIV) after  
370 AAV-DLX2.0-SYFP2 virus application. Fluorescently labeled neurons were routinely generated from this viral  
371 vector for MPC recordings at this early time point. **a**, Native SYFP2 viral labeling is shown in the area the  
372 electrophysiology experiment was performed. **b**, Connectivity assay with MPC recording. Traces were averaged  
373 with 10 repetitive stimuli.

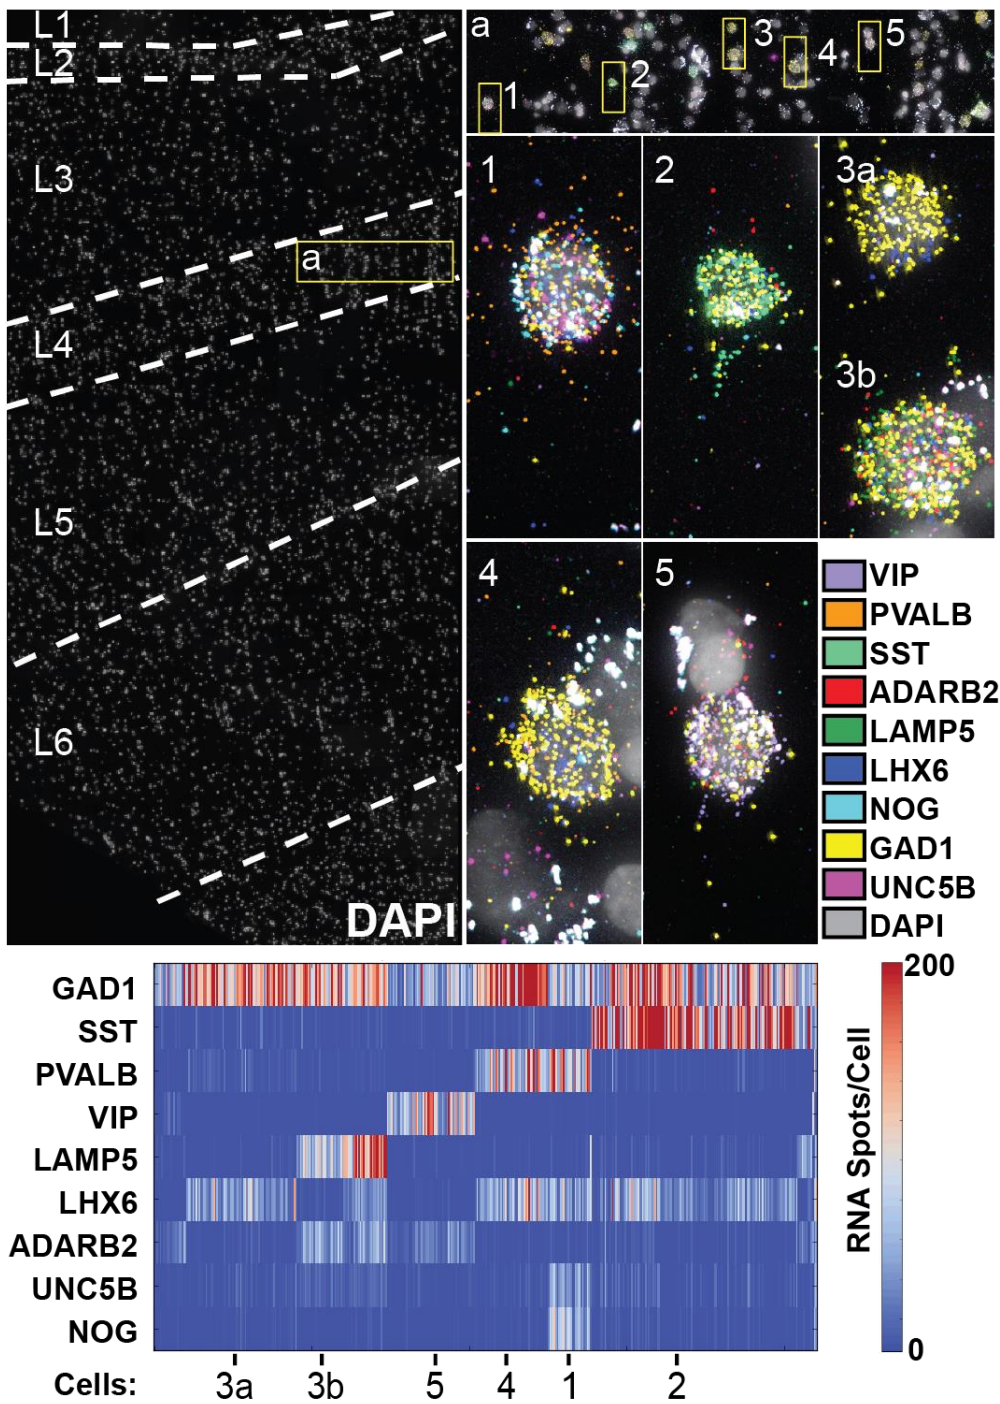

**Extended Data Fig. 2 | GABAergic cell identification with multi-round HCR staining in thin frozen tissue.** Nine GABAergic neuron marker genes were evaluated in frozen then thawed thin (10  $\mu$ m) slice preparation. Fluorescence montage with nuclei stained by DAPI (top left). Neocortical layers were determined from the DAPI stain. **a**, yellow boxed region (left) shown at higher resolution (right). The nine genes resolved the main cortical interneuron subclasses and one cell type (top right). RNA spots per cell are quantified (bottom), and largely reflect GABAergic subclasses observed in human transcriptomics studies (Lake et al., 2016; Hodge et al., 2019). The some of the same marker genes were used for MPC recording and post-hoc HCR staining in thick tissue preparation shown in **Figs. 2,3**, and **Extended Data Figs. 3,5,6**.



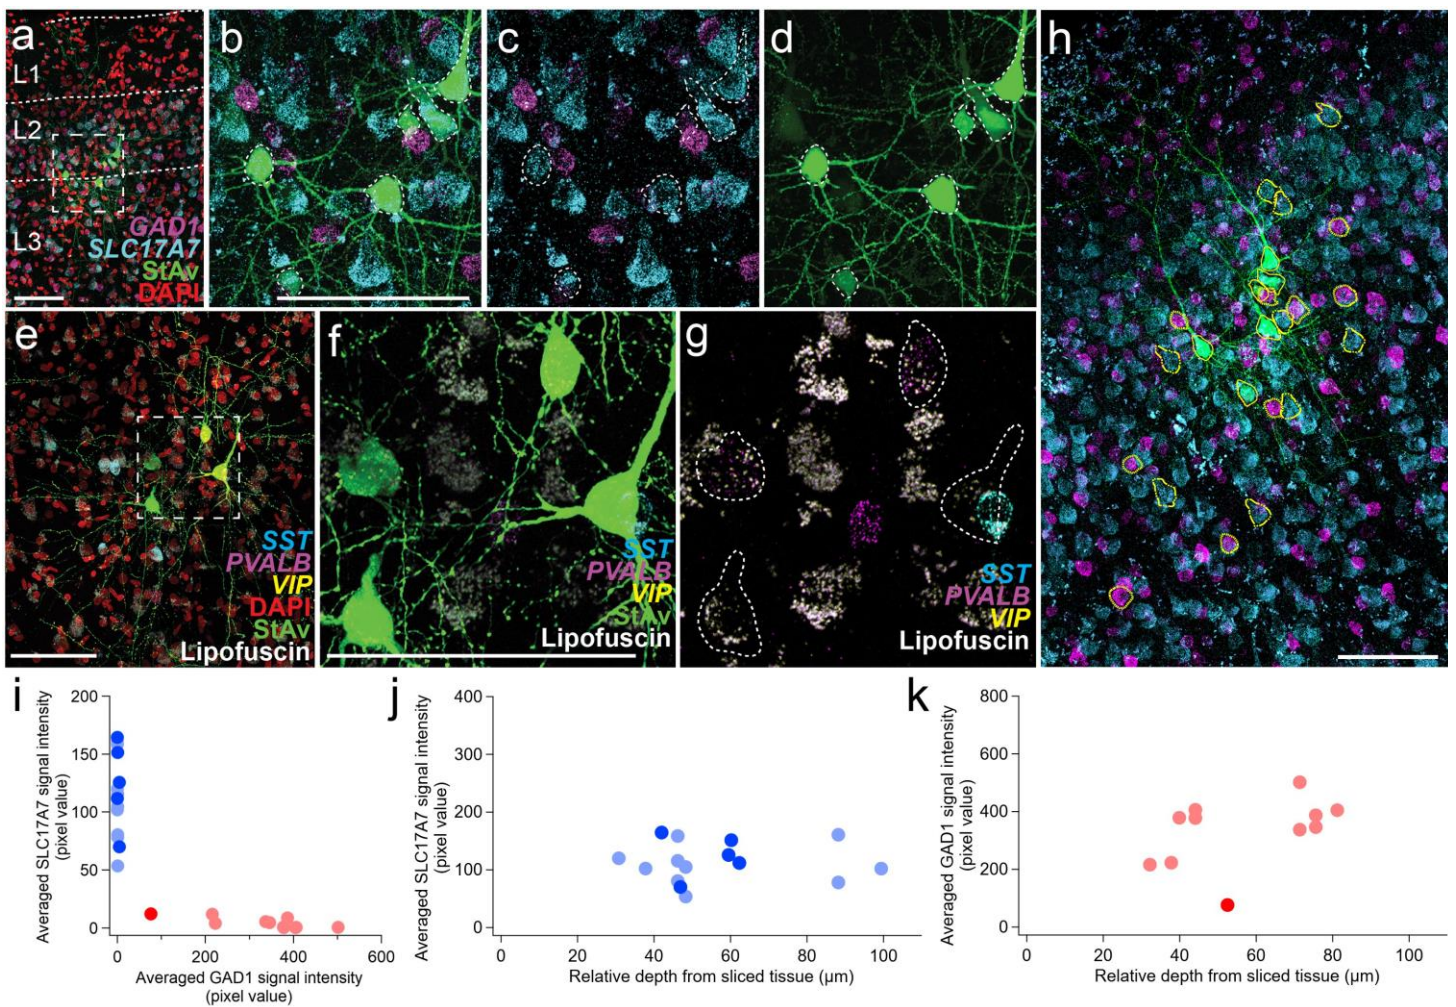

384  
385

386 **Extended Data Fig. 3 | Two examples of MPC experiments with excitatory and inhibitory HCR markers in**  
 387 **acute *ex vivo* human neocortex and depth dependence of HCR signals.** There are two examples of MPC  
 388 experiments. One shown in **a-d,h-k** and the other shown in **e-g**. **a**, Fluorescence montage of maximum intensity  
 389 projections showing mFISH staining for excitatory (*SLC17A7*) and inhibitory (*GAD1*) neuron marker transcripts,  
 390 nuclei (DAPI), and patched neurons (biocytin). Note that there is no *SLC17A7* labeling in layer 1. (**b-d**)  
 391 Enlargement of boxed region from **a**. **e**, Fluorescence montage showing four adjacent multi-patched cells from a  
 392 different experiment. **f-g**, Four cells are shown, two of which are marked by the *PVALB* transcript. Note, although  
 393 the cell on the right overlaps with *SST*, this is a different Z-plane than the patched cells. The *VIP* transcript stained  
 394 neurons are not shown in the field of view but some patched neurons showed *VIP* labeling in another region of  
 395 this slice (data not shown). *SLC17A7* and *GAD1* mRNA staining signals were manually segmented and compared  
 396 among the cells located in different depth from the slice surface (**h-k**). **h**, Yellow lines show 3D manually  
 397 segmented neurons in a maximum intensity projection montage image that are used in panel **i-k**. **i**, *SLC17A7* and  
 398 *GAD1* expression is mutually exclusive. Blue indicates *SLC17A7*<sup>+</sup> neurons (patched neurons, blue; unpatched  
 399 neurons, light blue) and red indicates *GAD1*<sup>+</sup> neurons (patched neurons, red; non-patched neurons, light red).  
 400 Same cells are displayed with depth dependent manner (**j-k**). **j**, *SLC17A7*<sup>+</sup> positive neurons are displayed along  
 401 relative depth of the slice. **k**, Similarly, *GAD1*<sup>+</sup> positive neurons are displayed along relative depth of the slice.  
 402 Scale bars, 100 μm in **a,b,e,f,h**.



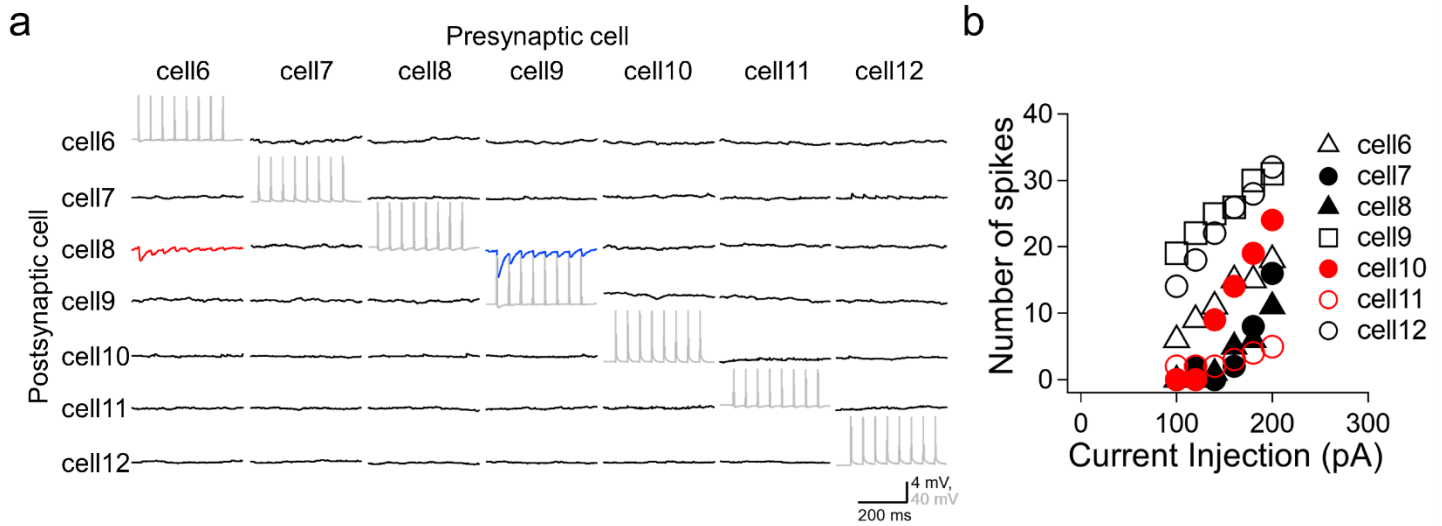

403

404 **Extended Data Fig. 4 | Further information of local connectivity and frequency-current relationship from**  
405 **AAV-labeled cortical slice shown in Fig. 3. i (site2).** Traces of local synaptic connectivity of patched neurons  
406 shown in **site 2**. Traces were averaged over 5 repetition of the 8 pulses stimulation at 20 Hz. Inhibitory connections  
407 from cell6 to cell8 (postsynaptic response; red) and from cell9 to cell8 (postsynaptic response; blue) are  
408 highlighted and recovery dynamics on these connections are shown in **Fig. 3.g-h**. **b**, Frequency-current curves  
409 from the trial shown in **site 2** of panel **i** (**Fig. 3**).

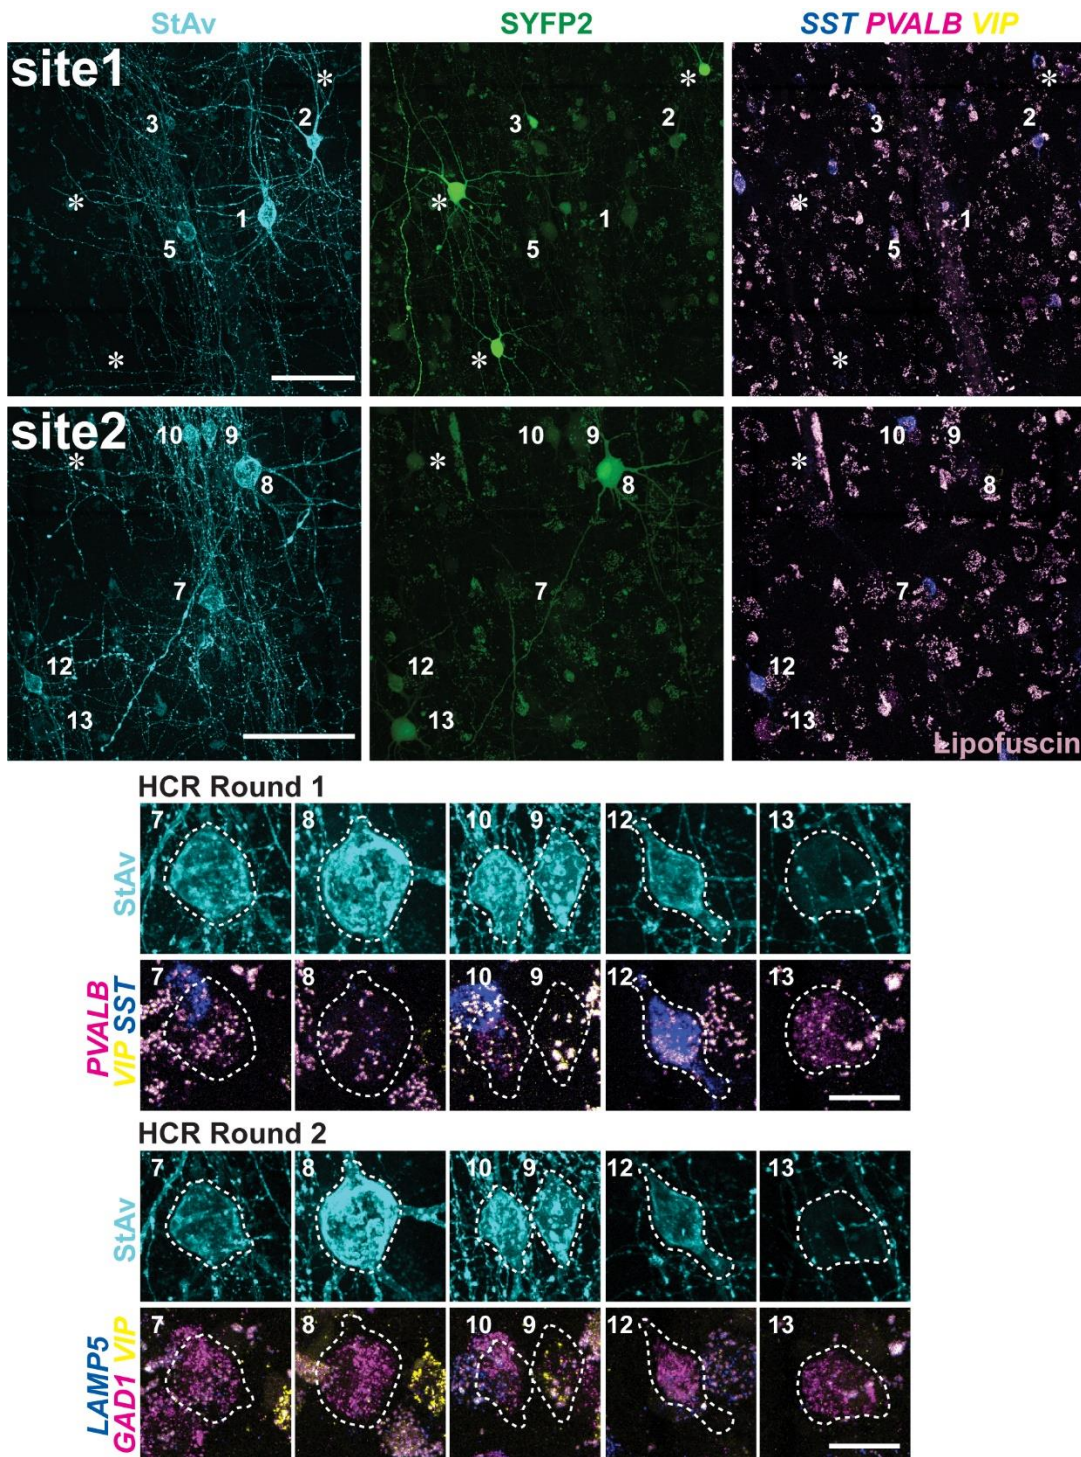

410

411

412

413

414

415

416

**Extended Data Fig. 5 | Further information of HCR staining assays shown in Fig. 3. Upper panel,** high magnification images of **site1** and **site2** shown in **Fig. 3**. Patched neurons displayed with biocytin/streptavidin only staining (StAv; left) or SYFP2 (SYFP2; middle), mFISH, and lipofuscin (light purple; right). Asterisks mark SYFP2<sup>+</sup> cells not marked by biocytin/streptavidin. Scale bar, 100  $\mu$ m. **Lower panel,** High resolution images of individual patched cells stained by mFISH in round 1 against *PVALB*, *SST*, and *VIP*, and round 2 against *LAMP5*, *GAD1*, and *VIP*. Scale bar, 10  $\mu$ m. Cell numbers are labeled consistently in **Figure 3**.

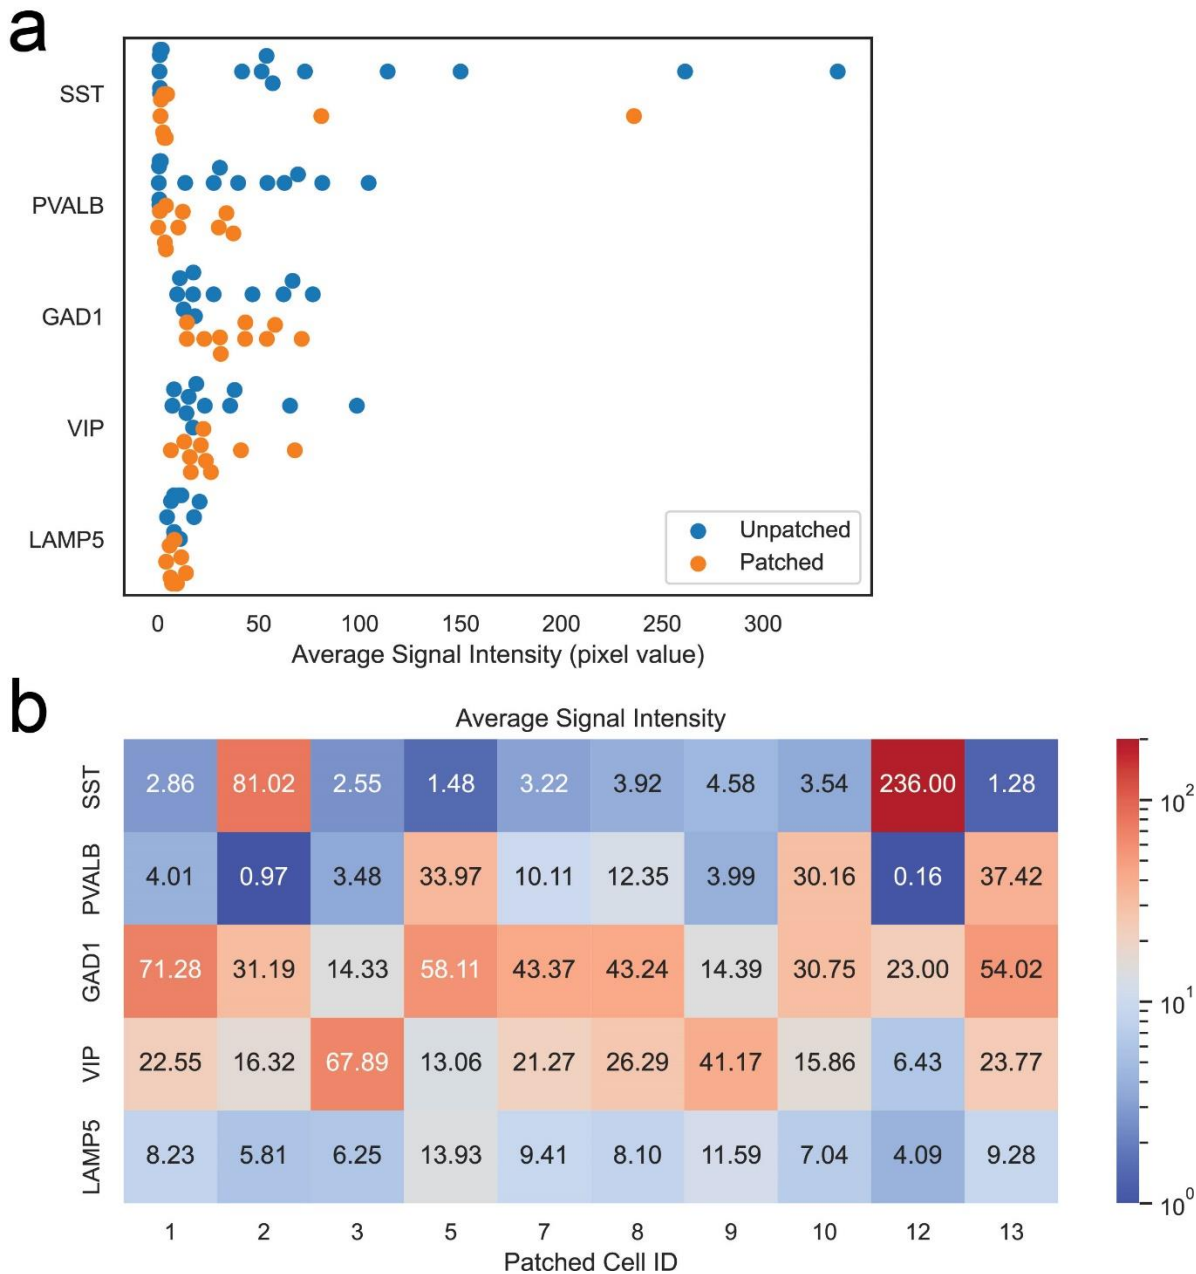

417  
418

419

420

421

422

423

424

425

**Extended Data Fig. 6 | Quantification of HCR signal in slice culture preparation** (related to **Figure 3** and **Extended Data Figure 5**). **a**, HCR signal comparison between patched and non-patched neighboring neurons. Both patched and non-patched neighboring neurons were manually segmented in 3D. Average intensity values of HCR signals in each neuron were quantified and displayed. Orange closed circles indicate the patched neurons shown in **Figure 3** and blue closed circles indicate non-patched neighboring neurons. **b**, Heat map displaying average fluorescence signal intensity values from manually segmented patched neurons. Patched cell numbers (Patched Cell ID) refer to the cells in **Figure 3m**.



## 426 **Methods**

### 427 **Acute slice preparation**

428 Human cortical tissues were collected from adult patients undergoing neurosurgical procedures to treat symptoms  
429 associated with either epilepsy or brain tumor. Surgical specimens were obtained from local hospitals  
430 (Harborview Medical Center, Swedish Medical Center, and University of Washington Medical Center) in  
431 collaboration with local neurosurgeons. Surgically resected neocortical tissue was distal to the pathological core  
432 (i.e. tumor tissue or mesial temporal structures). Detailed histological assessment and using a curated panel of  
433 cellular marker antibodies indicated a lack of overt pathology in surgically resected cortical slices (Berg et al.,  
434 2020).

436 In this study, we included data from 15 surgical cases, 10 of which were epilepsy cases and the remaining 5 were  
437 tumor cases ( $49 \pm 15$  years, mean  $\pm$  standard deviation, min: 21, max: 68). All specimens derived from neocortex  
438 with the majority of cases derived from the temporal lobe ( $n = 8$ ) while a minority were obtained from the frontal  
439 lobe ( $n = 4$ ) or parietal lobe ( $n = 1$ ). A total of 12 acute slices were tested for the identification of gene expression  
440 with mFISH/HCR after MPC recordings.

442 Surgical specimens were immediately transported (15-35 min) from the operating room to the laboratory in chilled  
443 (0-4°C) artificial cerebral spinal fluid (aCSF) slicing solution containing (in mM): 92 N-Methyl-D-glucamine  
444 (NMDG), 2.5 KCl, 1.25 NaH<sub>2</sub>PO<sub>4</sub>, 30 NaHCO<sub>3</sub>, 20 4-(2-hydroxyethyl)-1-piperazineethanesulfonic acid  
445 (HEPES), 25 D-glucose, 2 thiourea, 5 Na-L-ascorbate, 3 Na-pyruvate, 0.5 CaCl<sub>2</sub>, and 10 MgSO<sub>4</sub> (Ting et al.,  
446 2014). The NMDG aCSF was continuously bubbled with carbogen (95% O<sub>2</sub> and 5% CO<sub>2</sub>). Osmolality was  
447 measured and adjusted to 300-315 mOsmoles/kg range (305-315 mOsmoles/kg range when using a freezing point  
448 osmometer, and 300-310 mOsmoles/kg range if using vapor pressure osmometer), and the pH was measured and  
449 adjusted to 7.3-7.4. 350  $\mu$ m thick human cortical slices were prepared using a Compressome VF-300  
450 (Precisionary Instruments) or VT1200S (Leica Biosystems). After being cut, slices were transferred to oxygenated  
451 NMDG aCSF maintained at 34°C for 10 min. Slices were kept at room temperature in oxygenated holding aCSF  
452 solution containing (in mM): 92 NaCl, 30 NaHCO<sub>3</sub>, 25 D-Glucose, 20 HEPES, 5 Na-L-Ascorbate, 3 Na Pyruvate,  
453 2.5 KCl, 2 CaCl<sub>2</sub>, 2 MgSO<sub>4</sub>, 2 Thiourea, 1.2 NaH<sub>2</sub>PO<sub>4</sub> prior to recording (Seeman et al., 2018; Berg et al., 2020).

### 455 **Slice culture preparation**

456 Following brain slice preparation and NMDG recovery steps as outlined above, a subset of brain slices were  
457 transferred to a 6-well plate for culture and viral transduction. Human cortical brain slices were placed on  
458 membrane inserts (Millipore #PICMORG), and the wells were filled with 1 mL of culture medium consisting of  
459 8.4 g/L MEM Eagle medium, 20% heat-inactivated horse serum, 30 mM HEPES, 13 mM D-glucose, 15 mM  
460 NaHCO<sub>3</sub>, 1 mM ascorbic acid, 2 mM MgSO<sub>4</sub>, 1 mM CaCl<sub>2</sub>, 0.5 mM GlutaMAX-I, and 1 mg/L insulin (Ting et  
461 al 2018). The slice culture medium was carefully adjusted to pH 7.2-7.3, osmolality of 300-310 mOsmoles/Kg  
462 by addition of pure H<sub>2</sub>O, sterile-filtered and stored at 4°C for up to two weeks. Culture plates were placed in a  
463 humidified 5% CO<sub>2</sub> incubator at 35°C. 1-3 hours after brain slices were plated on cell culture inserts, brain slices  
464 were infected by direct application of concentrated AAV viral particles over the slice surface (Ting et al 2018).  
465 The slice culture medium was replaced every 2-3 days until initiating synaptic physiology experiments. The time  
466 window to perform slice culture experiments ranged from 2.5 to 7 DIV, and a total of 15 cultured human  
467 neocortical slices were used in this study for the identification of gene expression with mFISH/HCR after MPC  
468 recordings.

### 470 **Viral vector production**

471 Recombinant AAV vectors were produced by triple-transfection of ITR-containing enhancer plasmids along with  
472 AAV helper and rep/cap plasmids using the AAV293 cell line, followed by harvest, purification and concentration

of the viral particles. The AAV293 packaging cell line and plasmid supplying the helper function are available from a commercial source (Cell Biolabs). The PHP.eB capsid variant was generated by Dr. Viviana Gradinaru at the California Institute of Technology (Chan et al., 2017) and the DNA plasmid for AAV packaging is available from Addgene (plasmid#103005). Quality control of the packaged AAV was determined by qPCR to determine viral titer (viral genomes/mL), and by Sanger sequencing of the AAV genome to confirm the identity of the viral vector that was packaged.

### **CN1390 vector design and construction**

Human neocortical interneurons were targeted in cultured slices by transducing slices with an optimized forebrain GABAergic viral vector CN1390, also known as pAAV-DLX2.0-SYFP2. The DLX 2.0 sequence includes a 3x concatemer of the core region of a previously well-characterized DLX I56i forebrain GABAergic neuron enhancer (Dimidischstein et al 2016; Zerucha et al, 2000). The 131 bp core sequence of the hI56i enhancer was inferred from enhancer bashing experiments detailed in Zerucha et al, 2000. The 393 bp 3x core enhancer concatemer sequence was custom gene synthesized and subcloned into pAAV-minBetaGlobin-SYFP2-WPRE3-BGHpA upstream of the minimal promoter to make pAAV-DLX2.0-SYFP2, vector ID# CN1390 in our catalog. This vector will be deposited to Addgene for distribution to the academic community upon publication.

### **Electrophysiology**

Experiments were conducted on an upright microscope with an oblique condenser (WI-OBCD, Olympus) equipped with infrared (850 nm) illumination, 490 nm, 565 nm and ultraviolet laser (395 nm) lines (Thorlab). 4x and 40x objectives (Olympus) were used to visualize the sample and a digital CMOS camera (Flash 4.0 V2, Hamamatsu) to take images. The rig configuration included eight electrodes disposed around the recording chamber, each surrounded by an headstage shield in order to prevent electrical crosstalk artifacts. Each patch electrode was positioned by xy stage and micromanipulator (PatchStar, Scientifica) with guidance of acq4 open python platform software (acq4.org; Campagnola et al., 2014). Bright-field and fluorescent images were also captured and analyzed with acq4. Signals were amplified using Multiclamp 700B amplifiers (Molecular Devices) and digitized at 50-200 kHz using ITC-1600 digitizers (Heka). Pipette pressure was controlled using electro-pneumatic pressure control valves (Proportion-Air; PA2193). The recording software, Igor Pro7 or 8 (WaveMetrics), contained with a custom software Multi-channel Igor Electrophysiology Suite (MIES; <https://github.com/AllenInstitute/MIES>), used to apply the bias current, inject the appropriate amount of current to patched cells, data acquisition and pressure regulation.

Slices were transferred to the recording chamber and perfused with carbogenated aCSF (2mL/min), constant temperature (31-32 °C), pH 7.2-7.3 and oxygen saturation in the recording chamber (40-50%). Perfusing aCSF contained (in mM): 1.3 CaCl<sub>2</sub>, 12.5 D-Glucose, 1 or 2 MgSO<sub>4</sub>, 1.25 NaH<sub>2</sub>PO<sub>4</sub>, 3 KCl, 18 NaHCO<sub>3</sub>, 126 NaCl, 0.16 Na-L-Ascorbate. Patch pipettes were pulled from thick-wall filamented borosilicate glass (Sutter Instruments) using a DMZ Zeitz-Puller (Zeitz) to a tip resistance of 3-8 MΩ, and filled with intracellular solution containing (in mM) either 0.3 ethylene glycol-bis(b-aminoethyl ether)-N,N,N',N'-tetraacetic acid (EGTA) or no EGTA in addition to: 130 K-gluconate, 10 HEPES, 3 KCl, 0.23 Na<sub>2</sub>GTP, 6.35 Na<sub>2</sub>Phosphocreatine, 3.4 Mg-ATP, 13.4 Biocytin, and fluorescent dye with 50 μM Alexa-488 or cascade blue. Solution osmolarity ranged from 280 to 295 mOsmoles/kg titrated with sucrose, pH between 7.2 and 7.3 titrated with KOH. The liquid junction potentials were not corrected. For slice culture experiments, GABAergic neurons labeled with AAV-DLX2.0-SYFP2 were targeted during patch pipettes were approaching. With cascade blue loaded in the patch pipette, overlaid signals in the same cells with both SYFP2 and cascade blue were confirmed by manual inspection of image stacks with blue and green LED light excitation.

Cell cluster of eight neurons at each trial was selected and attempt for multiple whole-cell patch-clamp (MPC) recordings, targeted in mainly supraganular layer (L2 and L3), 50-80 μm depth from slice surface and smooth



somatic appearance. Pairwise recordings were performed for local synaptic connectivity assay with both voltage and current-clamp mode. In voltage-clamp mode, membrane voltages of all patched cells were held at either -70 or -55 mV and brief depolarization to 0 mV for 3 ms at 20 Hz sequentially to reliably identify both excitatory and inhibitory connections. In current-clamp mode, initially all cell membrane potentials were maintained at  $-70 \pm 2$  mV with automated bias current injection when we generated presynaptic unitary action potential by brief current injections (1.5-3 ms) to detect EPSP responses in postsynaptic cells. For inhibitory connection, cell membrane potentials were maintained at  $-55 \pm 2$  mV to detect IPSP responses in postsynaptic cells.

For the short-term plasticity, there are 12 action potentials at multiple frequencies (10, 20, 50, and 100 Hz) to induce sequential postsynaptic responses in connected pairs. Presynaptic stimulus amplitudes were adjusted to generate unitary action potential in each pulse. In order to measure recovery time course after induction protocol (i.e. initial 8 pulses), inter-spike interval between 8<sup>th</sup> and 9<sup>th</sup> pulses at 50 Hz stimulation was varied sequentially at 125, 250, 500, 1000, and 4000 ms. For other frequency stimulation (10, 20, and 100 Hz), we used fixed 250 ms inter-spike interval between 8<sup>th</sup> and 9<sup>th</sup> pulses. Stimuli were interleaved between cells such that only one cell was spiking at a time, and no two cells were ever evoked to spike within 150 ms of each other (Seeman et al., 2018). At each sequential 12 pulses stimulation for all patched neurons were repeated with 15 s inter-sweep interval. After running connectivity protocol, step current injections in each cell were applied to extract intrinsic membrane properties such as spike shape and frequency-current relationship.

#### **Data analysis**

Synaptic connectivity and dynamics, intrinsic membrane properties were analyzed with custom-written MATLAB (MathWorks) and Igor (Wavemetrics) software. Somatic position of individual neurons in a cluster from electrophysiological recording was imaged with fluorescent dyes (Alexa488 or cascade blue) with upright microscope and saved in ACQ4. Consequently, recorded neurons were identified with biocytin staining image and matched with mFISH/HCR signals taken by inverted confocal microscope.

#### **Thick tissue mFISH sample preparation**

Slices were fixed in 4% PFA for 2 hours at room temperature (RT), washed three times in PBS for 10 min each, then transferred to 70% EtOH at 4°C for a minimum of 12 hours, and up to 30 days. Slices were then incubated in 8% SDS in PBS at RT for two hours with agitation. The solution was exchanged with 2X sodium chloride sodium citrate (SSC) three times, slices were washed for one hour at RT, followed by two additional (1 hour each) washes with fresh 2X SSC.

#### ***In situ* HCR for thick tissue**

We performed HCR v3.0 using reagents and a modified protocol from Molecular Technologies and Molecular Instruments (Choi et al., 2014). Slices were incubated in pre-warmed 30% probe hybridization buffer (30% formamide, 5X sodium chloride sodium citrate (SSC), 9 mM citric acid pH 6.0, 0.1% Tween 20, 50 µg/mL heparin, 1X Denhardt's solution, 10% dextran sulfate) at 37°C for 5 min, then incubated overnight at 37°C in hybridization buffer with the first three pairs of probes added at a concentration of 4 nM. The hybridization solution was exchanged 3 times with 30% probe wash buffer (30% formamide, 5X SSC, 9 mM citric acid pH 6.0, 0.1% Tween 20, 50 µg/mL heparin) and slices were washed for one hour at 37°C. Probe wash buffer was briefly exchanged with 2X SSC, then amplification buffer (5X SSC, 0.1% Tween 20, 10% dextran sulfate) for 5 min. Even and odd hairpins for each of the three genes were pooled and snap-cooled by heating to 95°C for 90 seconds then cooling to RT for 30 min. The hairpins were then added to amplification buffer at a final concentration of 60 nM, and slices were incubated in amplification solution for 4 hours at RT. This was followed by a brief wash with 2X SSC and a one hour, room temperature incubation in 2X SSC containing 8 µg/µl Brilliant Violet 421™ Streptavidin (BioLegend, Cat. No. 405225) and 0.05% Tween 20. Slices were washed three times for 10 min in 2X SSC. For each round of imaging, an aliquot of 67% 2,2'-Thiodiethanol (TDE) solution was prepared for use

569 as a clearing and immersion fluid.  $\geq 99\%$  TDE (Sigma-Aldrich) was mixed with DI water to create a 67% TDE  
570 solution with a refractive index of 1.46, verified by a pocket refractometer (PAL-RI, Atago). Slices were  
571 transferred to 67% TDE and allowed to equilibrate for at least 1 hour at room temperature prior to imaging.  
572

### 573 **Quantification of thick tissue mFISH signals**

574 Patched cells from acute and cultured tissues were hand segmented volumetrically using QuPath software  
575 (Bankhead et al., 2017). Segmentation was performed on either the SYFP2 labeled cell body (slice culture  
576 preparation) or HCR signal (acute slice preparation) in transcript positive cells. Additionally, several nearby cells  
577 were also segmented in order to characterize typical expression levels in each probed gene and to compare signal  
578 level to patched cells. For each imaged channel, a histogram of non-cellular pixels was used to calculate a  
579 background threshold, which was taken to be three times the half width at half maximum above median of the  
580 distribution of pixel values. A mask of lipofuscin pixels was constructed by first taking all pixels that exceeded  
581 this threshold in all HCR channels. This mask was additionally expanded by morphological dilation with a kernel  
582 of radius one pixel, iterated two times. For each segmented cell, this mask was applied to each channel and the  
583 remaining intensity above background was integrated and normalized to the cell volume, this is taken as a measure  
584 of expression in each channel and reported in **Figure 3** and **Extended Data Figures 3,5,6**.

### 586 **Confocal imaging**

587 Thick tissue images were acquired on an Olympus FV3000 confocal microscope using a 30X silicon oil objective  
588 with the zoom set to 1.5x. The image montage stacks were acquired through the depth of the tissue at 1.2  $\mu\text{m}$   
589 steps. For figures, maximum intensity projections though the region of interest were generated are shown. Note  
590 that some montages exhibit stitching artifacts. Due to the frequent appearance of lipofuscin in aging human  
591 tissues, we showed HCR images as multiple overlapping channels since the lipofuscin granules were revealed as  
592 spots that are fluorescent in every channel.  
593

### 594 **Stripping and subsequent hybridization rounds**

595 To strip the signal in preparation for subsequent rounds, 67% TDE was exchanged with 2X SSC three times and  
596 samples were washed for 1 hour. 2X SSC was replaced with 1X DNase buffer for 5 min and then a 1:50 dilution  
597 of DNase I in DNase buffer (DNase I recombinant, RNase-free, Roche, Cat. No. 04716728001), and incubated  
598 for 1 hour at 37°C. This solution was replaced with fresh DNase solution before incubating slices overnight at  
599 37°C. Slices were washed with 65% formamide in 2X SSC for one hour at 37°C, then 2X SSC for one hour at  
600 RT, before being transferred to 67% TDE for at least one hour. After imaging to confirm the signal was gone, the  
601 slices were washed in 2X SSC for one hour to remove TDE before proceeding to subsequent hybridization rounds,  
602 which followed the protocol described above, except omitting the incubation in streptavidin solution.  
603

### 604 **Thin tissue section mFISH sample preparation**

605 Human neocortical tissue from surgical resections was frozen in OCT without fixation. 10 $\mu\text{m}$  sections were cut  
606 and attached to silanized #1.5 coverslips and stored in a sealed chamber at -80°C. For staining, samples were  
607 thawed in fresh 4% PFA for 15 minutes, and then transferred to 70% ethanol and incubated for either 2 hours or  
608 overnight. Permeabilize for 10 minutes in 8% SDS in 1xPBS at room temperature, then wash in 70% ethanol  
609 twice with one-minute incubations, and dry slide completely. SecureSeal Hyb chambers (Grace Bio-Labs) were  
610 adhered to the coverslip for staining.  
611

### 612 ***In situ* HCR for thin sections**

613 HCR was conducted as in thick tissues, with the exception that the probe wash time was reduced to 30 minutes,  
614 and HCR hairpin amplification was reduced to 1 hour at room temperature. Stripping the HCR signal for multi-  
615 round labeling was carried out in a similar manner to thick tissue sections, but with only a single incubation for  
616 two hours in DNase1 solution (**Extended Data Fig. 2**).

617  
618  
619  
620  
621  
622  
623  
624  
625  
626  
627  
628  
629  
630  
631  
632  
633  
634  
635  
636  
637  
638  
639  
640  
641  
642  
643  
644  
645  
646  
647  
648  
649  
650  
651  
652  
653  
654  
655  
656  
657  
658  
659  
660  
661  
662

### Thin section imaging and analysis

After HCR amplification, anti-photobleaching buffer (1mM Trolox solution (Sigma Aldrich), 40U/ml Catalase (Abcam), 40U/ml Glucose oxidase (Sigma Aldrich), and 1:100 RNase inhibitor (Clontech) was applied to stained samples in SecureSeal chambers on coverslips. The coverslips were placed in a stainless steel chamber fitted to the insert of the motorized x-y stage (ASI MS-2000). Samples were imaged on an inverted microscope (Zeiss AxioObserver) with a 63x oil immersion objective in the epifluorescence configuration with a square fiber laser illumination system (Andor Borealis). Each round of imaging produced four fluorescence channels (DAPI, Alexa 488, Alexa 568, Alexa 647) in z stacks at a multiple fields of view (FOV), where each FOV is the same nominal (x,y) location in each round of imaging. FOV images from each imaging round were registered to the first round using intensity correlation of the lipofuscin autofluorescence visible in the z-stack maximum projection of the 488 channel. In each FOV, HCR puncta were localized using bandpass filtering and local-max-peak finding, yielding HCR spot locations with their integrated brightness and radius of gyration. Lipofuscin autofluorescence was removed from this HCR signal by filtering the large and bright particles. Further lipofuscin rejection was accomplished by eliminating particles found within a 2-pixel (400 nm) radius in all channels in any imaging round. The remaining HCR signal was associated with individual inhibitory cells following manual segmentation of GAD1-positive cell bodies in FIJI. The 421 inhibitory cells in **Extended Data Figure 2**, were grouped in the heat map based on a binary thresholds on HCR spots per cell area.

### Morphological reconstruction

Reconstructions of the dendrites and the initial part of the axon (spiny neurons) and/or the full axon (aspiny/sparsely spiny neurons) were generated for a subset of neurons with good-quality electrophysiology and biocytin fills. Reconstructions were generated based on a 3D image stack taken by confocal microscope that was run through a Vaa3D-based image processing and reconstruction pipeline (Peng et al., 2010). The process could include a variable enhancement of the signal-to-noise ratio in the image (Peng et al., 2014). Reconstructions were manually corrected and curated using a range of tools (e.g., virtual finger, polyline) in the Mozak extension (Zoran Popovic, Center for Game Science, University of Washington) of Terafly tools (Peng et al., 2014; Bria et al., 2016) in Vaa3D. Every attempt was made to generate a completely connected neuronal structure while remaining faithful to image data. If axonal processes could not be traced back to the main structure of the neuron, they were left unconnected. As a final step in the manual correction and curation process, an alternative analyst checked for missed branches or inappropriate connections. Once the reconstruction was deemed complete, multiple plugins were used to prepare neurons (saved as SWC files) for morphological analyses.

### References for Methods

Bankhead, P. et al. QuPath: Open source software for digital pathology image analysis. *Sci Rep* **7**, 16878. doi: 10.1038/s41598-017-17204-5 (2017).

Bria, A. et al. TeraFly: real-time three-dimensional visualization and annotation of terabytes of multidimensional volumetric images. *Nat. Methods* **13**, 192-194 (2016).

Campagnola, L. et al. ACQ4: an open-source software platform for data acquisition and analysis in neurophysiology research. *Front Neuroinform* **8**, 3. doi: 10.3389/fninf.2014.00003 (2014).

Chan, K.Y. et al. Engineered AAVs for efficient noninvasive gene delivery to the central and peripheral nervous systems. *Nat Neurosci.* **20**, 1172-1179 (2017).

Choi, H.M. et al. Next-generation in situ hybridization chain reaction: higher gain, lower cost, greater durability. *ACS Nano* **8**, 4284-4294 (2014).

Peng, H. et al. V3D enables real-time 3D visualization and quantitative analysis of large-scale biological image data sets. *Nat. Biotechnol.* **28**, 348-353 (2010).

663 Peng, H. et al. Extensible visualization and analysis for multidimensional images using Vaa3D. *Nat Protoc* **9**,  
664 193-208 (2014).

665 Ting, J.T. et al. Acute brain slice methods for adult and aging animals: application of targeted patch clamp analysis  
666 and optogenetics. *Methods Mol. Biol.* **1183**, 221-242 (2014).

667 Zerucha, T. et al. A highly conserved enhancer in the Dlx5/Dlx6 intergenic region is the site of cross-regulatory  
668 interactions between Dlx genes in the embryonic forebrain. *J. Neurosci.* **20**, 709-721 (2000).

## 669 **Acknowledgments**

670 We thank the Tissue Procurement, Tissue Processing, and Facilities teams for human tissue collection and brain  
671 slice preparation. We thank the hospital coordinators that help with logistics of collections and patient consent.  
672 We thank the Viral Technology team for packaging AAV vectors. We thank Lydia Potekhina and Shea Ransford  
673 for helping imaging on the confocal microscope. We thank Jennie Close for providing thin tissue sections from  
674 human donors. We thank Dr. Viviana Gradinaru for the gift of PHP.eB capsid packaging plasmid. We thank Dr.  
675 Christof Koch for comments on the manuscript. This work is supported in part by NIH BRAIN Initiative award  
676 #1RF1MH114126-01 from the National Institute of Mental Health to E.S.L., J.T.T., and B.P.L. The content is  
677 solely the responsibility of the authors and does not necessarily represent the views of the funding agencies. In  
678 addition, we wish to thank the Allen Institute for Brain Science founder, Paul G. Allen, for his vision,  
679 encouragement and support.  
680

## 681 **Author contributions**

682 M.H.K., J.T.T., B.P.L., E.S.L. conceptualized the project. N.D., A.L.K., J.G.O., D.L.S., R.P.G., C.C., C.D.K.  
683 procured human surgical tissues for the project. M.H.K., C.R. performed MPC recording experiments. L.C., T.J.  
684 provided technical support for MPC recordings. E.R.T., J.T.M. performed *post-hoc* mFISH staining and imaging  
685 with guidance of B.P.L. S.K., C.G. reconstructed morphologies of patched neurons with guidance of S.A.S. J.T.T.  
686 developed the DLX2.0 enhancer and CN1390 AAV vector and performed human *ex vivo* slice culture and viral  
687 transduction. B.L., M.J.T. performed quantification of HCR signals with guidance of P.R.N. M.H.K., T.J., G.M.,  
688 F.D. provided synaptic physiology project leadership and budgetary management. H.Z., E.S.L. provided cell type  
689 program leadership. M.H.K., C.R., E.R.T., B.L., M.J.T., B.P.L. analyzed data and prepared the figures. M.H.K.,  
690 C.R., J.T.T., B.P.L., E.S.L. wrote the manuscript with input from all authors.  
691

## 692 **Competing financial interests**

693 J.T.T., B.P.L, E.S.L are inventors on U.S. patent application #PCT\_US2019\_054539 related to this work (vector  
694 CN1390). All authors declare no other competing interests.  
695
